# Supplementary material for: The influence of a rock glacier on the riverbed hydrological system
Source: Copernicus journal article supplement (doi:10.5194/hess-29-6479-2025), 2025-11-19
Supplement: Supplementary file 1 [file Table S1.pdf › Table S1.pdf]

| CAMPAIGN    | Site   | Date       | Time  | pH   | EC ( $\mu\text{S cm}^{-1}$<br>at 25° C) | Water<br>temperature<br>(° C) | $\delta^{18}\text{O}$ (‰) vs.<br>VSMOW | $\delta^2\text{H}$ (‰) vs.<br>VSMOW | Na <sup>+</sup> (mg<br>L <sup>-1</sup> ) | K <sup>+</sup> (mg<br>L <sup>-1</sup> ) | Mg <sup>2+</sup> (mg<br>L <sup>-1</sup> ) | Ca <sup>2+</sup> (mg<br>L <sup>-1</sup> ) | F <sup>-</sup> (mg<br>L <sup>-1</sup> ) | Cl <sup>-</sup><br>(mg<br>L <sup>-1</sup> ) | SO <sub>4</sub> <sup>2-</sup><br>(mg<br>L <sup>-1</sup> ) | TDS (mg<br>L <sup>-1</sup> ) |
|-------------|--------|------------|-------|------|-----------------------------------------|-------------------------------|----------------------------------------|-------------------------------------|------------------------------------------|-----------------------------------------|-------------------------------------------|-------------------------------------------|-----------------------------------------|---------------------------------------------|-----------------------------------------------------------|------------------------------|
| JUNE 2022   | S-RG2  | 2022/06/12 | 16:54 | 8.34 | 184                                     | 0.05                          | -24.3                                  | -187.0                              | 0.13                                     | 0.23                                    | 4.81                                      | 17.84                                     | <0.005                                  | 0.02                                        | 8.94                                                      | 99.75                        |
|             | S-RG14 | 2022/06/15 | 15:30 | 8.07 | 167                                     | 0.14                          | -23.5                                  | -183.4                              | 0.26                                     | <0.005                                  | 0.46                                      | 17.33                                     | <0.005                                  | 0.02                                        | 2.01                                                      | 73.26                        |
|             | S-IDC1 | 2022/06/16 | 15:56 | 8.55 | 131                                     | 0.54                          | -23.5                                  | -182.6                              | 0.14                                     | <0.005                                  | 0.43                                      | 15.31                                     | <0.005                                  | 0.03                                        | 2.60                                                      | 64.30                        |
|             | S-IDC3 | 2022/06/16 | 15:37 | 8.69 | 148                                     | 0.11                          | -23.8                                  | -183.6                              | 0.03                                     | <0.005                                  | 0.44                                      | 13.18                                     | <0.005                                  | 0.01                                        | 2.07                                                      | 55.50                        |
|             | S-IDC4 | 2022/06/16 | 17:04 | 8.74 | 178                                     | 0.20                          | -23.7                                  | -182.6                              | 0.11                                     | <0.005                                  | 0.07                                      | 16.34                                     | <0.005                                  | 0.01                                        | 0.62                                                      | 66.74                        |
|             | S-IDC5 | 2022/06/16 | 17:40 | 8.42 | 133                                     | 0.05                          | -23.9                                  | -184.9                              | 0.03                                     | <0.005                                  | 0.33                                      | 15.85                                     | <0.005                                  | 0.01                                        | 4.35                                                      | 64.99                        |
|             | S-IDC1 | 2022/06/18 | 17:50 | 8.61 | 152                                     | 0.11                          | -23.5                                  | -182.9                              | 0.03                                     | <0.005                                  | 0.48                                      | 13.67                                     | <0.005                                  | <0.005                                      | 3.40                                                      | 57.35                        |
|             | S-IDC2 | 2022/06/18 | 17:56 | 8.61 | 219                                     | 0.43                          | -23.0                                  | -180.1                              | 0.05                                     | 0.05                                    | 0.48                                      | 21.09                                     | <0.005                                  | 0.05                                        | 3.20                                                      | 87.59                        |
|             | S-RG10 | 2022/06/19 | 12:43 | 8.85 | 143                                     | 0.38                          | -22.9                                  | -180.4                              | 0.04                                     | 0.03                                    | 0.01                                      | 14.33                                     | <0.005                                  | 0.02                                        | 0.95                                                      | 57.92                        |
|             | S-RG11 | 2022/06/19 | 12:35 | 9.76 | 138                                     | 0.28                          | -23.8                                  | -186.1                              | 0.02                                     | <0.005                                  | 0.22                                      | 6.65                                      | <0.005                                  | 0.02                                        | 0.54                                                      | 28.12                        |
|             | S-RG14 | 2022/06/19 | 14:25 | 7.92 | 182                                     | 0.48                          | -23.6                                  | -184.8                              | 0.03                                     | <0.005                                  | 0.41                                      | 16.06                                     | <0.005                                  | 0.03                                        | 0.83                                                      | 67.30                        |
|             | S-RG15 | 2022/06/19 | 15:17 | 8.57 | 215                                     | 2.24                          | -23.8                                  | -186.2                              | 0.03                                     | 0.07                                    | 0.31                                      | 23.29                                     | <0.005                                  | 0.01                                        | 2.23                                                      | 95.74                        |
|             | S-RG16 | 2022/06/19 | 15:42 | 8.69 | 207                                     | 0.38                          | -24.1                                  | -187.3                              | 0.03                                     | 0.06                                    | 0.44                                      | 19.57                                     | <0.005                                  | 0.02                                        | 6.40                                                      | 80.32                        |
|             | S-RG2  | 2022/06/19 | 15:08 | 8.38 | 204                                     | 0.03                          | -24.1                                  | -186.5                              | 0.03                                     | <0.005                                  | 3.40                                      | 16.18                                     | <0.005                                  | 0.01                                        | 5.58                                                      | 84.50                        |
|             | S-RG3  | 2022/06/19 | 14:48 | 8.52 | 194                                     | 1.43                          | -23.7                                  | -185.4                              | 0.04                                     | <0.005                                  | 3.58                                      | 15.78                                     | 0.01                                    | 0.01                                        | 5.85                                                      | 83.91                        |
|             | S-RG4  | 2022/06/19 | 13:52 | 8.05 | 348                                     | 2.70                          | -23.4                                  | -181.5                              | 0.17                                     | <0.005                                  | 7.40                                      | 30.70                                     | <0.005                                  | 0.02                                        | 10.98                                                     | 166.37                       |
|             | S-RG5  | 2022/06/19 | 13:45 | 8.29 | 215                                     | 3.19                          | -24.0                                  | -185.6                              | 0.21                                     | 0.21                                    | 2.89                                      | 18.52                                     | <0.005                                  | 0.07                                        | 14.93                                                     | 89.53                        |
|             | S-RG6  | 2022/06/19 | 13:30 | 8.41 | 178                                     | 0.15                          | -23.1                                  | -180.3                              | 0.03                                     | <0.005                                  | 0.37                                      | 18.18                                     | <0.005                                  | 0.01                                        | 0.90                                                      | 75.62                        |
|             | S-RG7  | 2022/06/19 | 13:18 | 8.42 | 206                                     | 0.67                          | -22.7                                  | -178.5                              | 0.04                                     | <0.005                                  | 1.05                                      | 21.26                                     | <0.005                                  | 0.01                                        | 1.56                                                      | 92.01                        |
|             | S-RG8  | 2022/06/19 | 12:50 | 8.30 | 577                                     | 0.42                          | -23.0                                  | -178.6                              | 0.54                                     | 0.19                                    | 13.36                                     | 49.54                                     | 0.02                                    | 0.04                                        | 53.94                                                     | 268.63                       |
| AUGUST 2022 | S-RUP  | 2022/08/16 | 12:00 | 8.26 | 431                                     | 5.07                          | -21.8                                  | -174.5                              | 0.40                                     | 0.27                                    | 10.48                                     | 36.10                                     | 0.03                                    | 0.05                                        | 63.86                                                     | 193.90                       |
|             | S-RUP  | 2022/08/16 | 16:16 | 8.41 | 189                                     | 5.15                          | -22.2                                  | -177.7                              | 0.16                                     | 0.11                                    | 3.61                                      | 17.67                                     | 0.02                                    | 0.03                                        | 20.86                                                     | 88.36                        |
|             | S-RG13 | 2022/08/16 | 13:47 | 8.49 | 225                                     | 1.11                          | -20.6                                  | -165.3                              | 0.14                                     | 0.14                                    | 2.90                                      | 25.27                                     | 0.01                                    | 0.05                                        | 4.12                                                      | 119.38                       |
|             | S-RG2  | 2022/08/16 | 11:15 | 8.20 | 593                                     | 0.24                          | -20.7                                  | -165.0                              | 0.37                                     | 0.44                                    | 13.49                                     | 41.59                                     | 0.02                                    | 0.08                                        | 71.11                                                     | 232.60                       |
|             | S-RG5  | 2022/08/16 | 11:30 | 8.28 | 359                                     | 0.94                          | -20.5                                  | -165.0                              | 0.22                                     | 0.09                                    | 5.80                                      | 31.78                                     | <0.005                                  | 0.01                                        | 12.54                                                     | 161.10                       |
|             | S-RG5  | 2022/08/16 | 16:04 | 8.59 | 367                                     | 1.17                          | -20.6                                  | -165.5                              | 0.24                                     | 0.18                                    | 5.74                                      | 31.49                                     | <0.005                                  | 0.04                                        | 11.77                                                     | 160.06                       |
|             | S-RG6  | 2022/08/16 | 12:40 | 8.25 | 318                                     | 1.63                          | -20.4                                  | -164.2                              | 0.19                                     | 0.40                                    | 4.92                                      | 29.81                                     | 0.01                                    | 0.86                                        | 6.62                                                      | 149.50                       |
|             | S-RG7  | 2022/08/16 | 13:05 | 8.03 | 657                                     | 2.08                          | -21.7                                  | -172.9                              | 0.50                                     | 0.14                                    | 15.25                                     | 52.45                                     | 0.02                                    | 0.04                                        | 72.47                                                     | 286.49                       |
|             | S-RG8  | 2022/08/16 | 13:15 | 7.98 | 711                                     | 1.15                          | -21.8                                  | -173.3                              | 0.56                                     | 0.13                                    | 16.29                                     | 53.61                                     | 2.80                                    | 1.91                                        | 80.19                                                     | 288.05                       |
|             | S-RG9A | 2022/08/16 | 12:13 | 8.01 | 656                                     | 1.33                          | -21.8                                  | -173.9                              | 0.54                                     | 0.13                                    | 15.20                                     | 51.75                                     | 0.03                                    | 0.02                                        | 69.24                                                     | 284.34                       |
|             | S-RUP  | 2022/08/17 | 13:12 | 8.09 | 249                                     | 3.47                          | -21.9                                  | -174.8                              | 0.25                                     | 0.04                                    | 5.47                                      | 21.27                                     | 0.02                                    | 0.03                                        | 31.96                                                     | 111.28                       |
|             | S-RG1  | 2022/08/17 | 11:58 | 7.59 | 748                                     | 0.43                          | -20.7                                  | -165.4                              | 0.31                                     | 0.12                                    | 25.57                                     | 43.73                                     | 0.04                                    | 0.05                                        | 128.40                                                    | 297.43                       |
|             | S-RG2  | 2022/08/17 | 12:14 | 8.04 | 571                                     | 0.74                          | -20.6                                  | -165.2                              | 0.36                                     | 0.31                                    | 13.74                                     | 42.24                                     | 0.02                                    | 0.07                                        | 73.28                                                     | 235.77                       |
|             | S-RG5  | 2022/08/17 | 12:44 | 8.26 | 343                                     | 1.04                          | -20.6                                  | -165.5                              | 0.26                                     | 0.39                                    | 5.71                                      | 31.80                                     | <0.005                                  | 0.03                                        | 11.80                                                     | 161.74                       |
|             | S-RG6  | 2022/08/17 | 13:05 | 8.26 | 312                                     | 1.58                          | -20.4                                  | -164.5                              | 0.19                                     | 0.05                                    | 4.97                                      | 29.92                                     | <0.005                                  | 0.02                                        | 7.02                                                      | 149.86                       |
|             | S-RG7  | 2022/08/17 | 13:58 | 8.05 | 620                                     | 2.15                          | -21.6                                  | -172.2                              | 0.49                                     | 0.09                                    | 14.85                                     | 51.71                                     | 0.02                                    | 0.02                                        | 68.64                                                     | 281.97                       |
|             | S-RG8  | 2022/08/17 | 14:13 | 7.97 | 622                                     | 4.01                          | -21.8                                  | -173.6                              | 0.55                                     | 0.11                                    | 16.48                                     | 54.39                                     | 0.03                                    | 0.03                                        | 78.58                                                     | 300.18                       |

|           |         |            |       |         |         |      |       |        |      |      |       |       |        |      |        |        |
|-----------|---------|------------|-------|---------|---------|------|-------|--------|------|------|-------|-------|--------|------|--------|--------|
|           | S-RG9A  | 2022/08/17 | 13:29 | 7.94    | 640     | 1.39 | -21.7 | -173.7 | 0.60 | 0.10 | 15.46 | 52.25 | 0.03   | 0.05 | 71.11  | 287.55 |
|           | S-RUP   | 2022/08/18 | 12:35 | 8.30    | 478     | 4.09 | -21.8 | -174.2 | 0.45 | 0.10 | 11.87 | 40.41 | 0.04   | 0.04 | 66.56  | 218.70 |
|           | S-GL1   | 2022/08/18 | 18:36 | 7.75    | 46      | 0.07 | -21.7 | -173.8 | 0.16 | 0.18 | 0.21  | 4.44  | 0.01   | 0.03 | 1.97   | 19.70  |
|           | S-GL2   | 2022/08/18 | 18:06 | 9.00    | 44      | 0.06 | -22.0 | -177.0 | 0.04 | 0.09 | 0.14  | 3.87  | 0.01   | 0.03 | 4.55   | 15.59  |
|           | S-GL3   | 2022/08/18 | 19:03 | 7.57    | 114     | 0.06 | -21.6 | -172.9 | 0.12 | 0.12 | 0.38  | 9.68  | <0.005 | 0.02 | 15.78  | 37.90  |
|           | S-IDC1  | 2022/08/18 | 20:29 | 8.29    | 431     | 0.58 | -21.5 | -171.7 | 0.68 | 0.37 | 5.28  | 37.09 | 0.01   | 0.03 | 42.95  | 173.58 |
|           | S-IDC5  | 2022/08/18 | 20:55 | 8.32    | 500     | 0.68 | -20.9 | -166.4 | 0.28 | 0.16 | 6.91  | 44.56 | 0.02   | 0.04 | 52.94  | 208.89 |
|           | S-RG1   | 2022/08/18 | 13:52 | 8.31    | 772     | 0.39 | -20.7 | -165.0 | 0.32 | 0.10 | 26.84 | 44.06 | 0.61   | 0.05 | 131.69 | 304.24 |
|           | S-RG12  | 2022/08/18 | 11:56 | 8.38    | 264     | 0.26 | -20.9 | -167.3 | 0.14 | 0.04 | 2.45  | 25.63 | 0.00   | 0.02 | 4.28   | 117.87 |
|           | S-RG13  | 2022/08/18 | 11:40 | 8.33    | 270     | 1.21 | -20.6 | -165.1 | 0.17 | 0.06 | 3.04  | 26.00 | <0.005 | 0.03 | 4.62   | 122.98 |
|           | S-RG5   | 2022/08/18 | 12:47 | 8.25    | 346     | 1.11 | -20.6 | -165.7 | 0.25 | 0.12 | 5.64  | 31.44 | 0.01   | 0.06 | 11.85  | 159.08 |
|           | S-RG6   | 2022/08/18 | 12:27 | 8.29    | no data | 1.63 | -20.4 | -164.5 | 0.20 | 0.00 | 4.93  | 29.82 | <0.005 | 0.01 | 6.89   | 149.16 |
|           | S-RG7   | 2022/08/18 | 12:14 | 8.03    | 651     | 1.81 | -21.6 | -172.4 | 0.51 | 0.13 | 15.22 | 52.39 | 0.03   | 0.04 | 70.05  | 286.71 |
|           | S-RG8   | 2022/08/18 | 11:11 | 7.87    | 700     | 1.01 | -21.7 | -173.1 | 0.57 | 0.11 | 16.50 | 54.63 | 0.05   | 0.73 | 78.27  | 300.88 |
|           | S-RUP   | 2022/08/19 | 13:01 | no data | 382     | 6.26 | -22.0 | -175.7 | 0.40 | 0.10 | 10.12 | 33.42 | 0.03   | 0.03 | 61.53  | 181.11 |
|           | S-RDOWN | 2022/08/19 | 13:05 | 8.32    | 503     | 4.57 | -21.9 | -174.4 | 0.58 | 0.21 | 12.79 | 43.79 | 0.03   | 0.06 | 67.24  | 238.49 |
|           | S-RG12  | 2022/08/19 | 12:10 | no data | 265     | 0.76 | -20.9 | -167.2 | 0.18 | 0.12 | 2.60  | 26.10 | 0.01   | 0.03 | 4.51   | 120.93 |
|           | S-RG14  | 2022/08/19 | 12:30 | 7.70    | 277     | 0.49 | -20.9 | -167.7 | 0.26 | 0.10 | 2.75  | 27.54 | <0.005 | 0.02 | 8.74   | 126.78 |
|           | S-RG5   | 2022/08/19 | 13:46 | no data | 324     | 2.87 | -20.6 | -165.5 | 0.20 | 0.10 | 5.54  | 31.06 | <0.005 | 0.01 | 11.04  | 156.98 |
|           | S-RG6   | 2022/08/19 | 13:24 | no data | 319     | 1.54 | -20.5 | -164.8 | 0.18 | 0.08 | 5.06  | 29.94 | <0.005 | 0.01 | 7.15   | 150.49 |
|           | S-RG7   | 2022/08/19 | 13:12 | no data | 621     | 3.20 | -21.6 | -172.5 | 0.52 | 0.08 | 15.62 | 52.46 | 0.03   | 0.03 | 70.87  | 289.10 |
|           | S-RG8   | 2022/08/19 | 12:34 | no data | 697     | 1.36 | -21.8 | -173.7 | 0.62 | 0.16 | 17.16 | 55.34 | 0.04   | 0.04 | 78.15  | 308.58 |
| JUNE 2023 | S-R1    | 2023/06/15 | 12:50 | 7.79    | 694     | 1.65 | -22.6 | -176.5 | 1.82 | 0.94 | 15.10 | 53.60 | 0.01   | 0.03 | 120.44 | 284.17 |
|           | S-R2    | 2023/06/15 | 13:07 | 7.8     | 698     | 1.51 | -22.6 | -176.7 | 3.02 | 0.72 | 15.14 | 50.98 | 0.54   | 0.10 | 121.01 | 276.25 |
|           | S-R3    | 2023/06/15 | 13:25 | 7.83    | 686     | 1.45 | -22.5 | -175.5 | 1.30 | 0.80 | 14.34 | 51.92 | 0.69   | 1.98 | 118.15 | 268.25 |
|           | S-R4A   | 2023/06/15 | 13:50 | 7.83    | 678     | 1.9  | -22.9 | -177.4 | 1.18 | 0.78 | 13.70 | 49.80 | 0.08   | 0.05 | 119.07 | 257.82 |
|           | S-R4B   | 2023/06/15 | 14:35 | 7.81    | 697     | 7.81 | -22.5 | 176.2  | 1.06 | 0.74 | 13.38 | 48.58 | 0.22   | 0.09 | 121.73 | 249.37 |
|           | S-R5A   | 2023/06/15 | 14:40 | 8.16    | 569     | 5.45 | -22.9 | 177.6  | 0.54 | 0.68 | 10.96 | 41.24 | 0.01   | 3.76 | 88.32  | 209.91 |
|           | S-R5B   | 2023/06/15 | 14:10 | 8.24    | 510     | 8.65 | -22.4 | -175.5 | 0.42 | 0.78 | 11.00 | 40.78 | 0.15   | 0.13 | 80.25  | 212.58 |
|           | S-R6    | 2023/06/15 | 16:40 | 8.06    | 455     | 5.26 | -22.8 | -178.4 | 0.50 | 0.76 | 8.06  | 36.28 | 0.01   | 3.13 | 83.53  | 174.20 |
|           | S-R7    | 2023/06/15 | 16:50 | 8.16    | 567     | 6    | -22.2 | -175.2 | 0.38 | 0.64 | 13.02 | 43.14 | 0.13   | 0.01 | 79.20  | 234.20 |
|           | S-R8    | 2023/06/15 | 17:00 | 8.23    | 508     | 6.93 | -22.4 | -175.1 | 0.22 | 0.62 | 10.36 | 39.64 | 0.09   | 0.08 | 56.26  | 209.65 |
|           | S-RG8   | 2023/06/15 | 14:55 | 7.76    | 723     | 0.88 | -22.9 | -177.9 | 1.36 | 0.74 | 15.76 | 56.42 | 0.17   | 0.06 | 128.53 | 294.79 |
|           | S-RG9A  | 2023/06/15 | 14:55 | 7.93    | 646     | 1.52 | -22.9 | -178.2 | 1.66 | 0.70 | 13.22 | 50.00 | 0.27   | 0.13 | 114.47 | 258.05 |
|           | S-R1    | 2023/06/16 | 13:00 | 8.1     | 697     | 1.46 | -22.5 | -176.7 | 1.20 | 0.52 | 13.50 | 50.52 | 0.15   | 0.07 | 123.18 | 257.66 |
|           | S-R2    | 2023/06/16 | 13:10 | 7.91    | 705     | 1.47 | -22.6 | -177.5 | 1.26 | 0.64 | 14.28 | 53.24 | 0.12   | 0.15 | 123.44 | 273.83 |
|           | S-R3    | 2023/06/16 | 13:40 | 7.86    | 695     | 1.51 | -22.8 | -178.0 | 1.22 | 0.54 | 14.50 | 54.44 | 0.12   | 0.12 | 121.43 | 280.15 |
|           | S-R4B   | 2023/06/16 | 14:20 | 7.8     | 705     | 1.5  | -22.7 | -177.8 | 1.06 | 0.52 | 14.26 | 52.56 | 0.15   | 0.04 | 121.96 | 270.33 |
|           | S-R5A   | 2023/06/16 | 15:10 | 8.09    | 595     | 4    | -22.3 | -175.9 | 1.70 | 0.78 | 13.20 | 48.88 | 0.14   | 1.60 | 110.06 | 254.18 |

|  |        |            |       |      |     |      |       |        |      |      |       |       |      |      |        |        |
|--|--------|------------|-------|------|-----|------|-------|--------|------|------|-------|-------|------|------|--------|--------|
|  | S-R5B  | 2023/06/16 | 15:25 | 8.28 | 537 | 8.45 | -22.5 | -177.0 | 0.38 | 0.56 | 11.20 | 41.70 | 0.04 | 0.05 | 78.93  | 217.47 |
|  | S-R5C  | 2023/06/16 | 14:45 | 8.31 | 539 | 9.41 | -22.4 | -176.0 | 0.28 | 0.56 | 10.58 | 39.84 | 0.05 | 0.08 | 79.93  | 205.52 |
|  | S-R6   | 2023/06/16 | 15:45 | 8.17 | 472 | 6.45 | -23.0 | -179.4 | 0.50 | 0.50 | 8.66  | 37.72 | 0.17 | 1.96 | 89.08  | 181.96 |
|  | S-R7   | 2023/06/16 | 16:00 | 8.09 | 577 | 7.97 | -22.1 | -173.8 | 0.58 | 0.58 | 11.48 | 39.18 | 0.08 | 0.05 | 79.40  | 209.52 |
|  | S-R8   | 2023/06/16 | 16:10 | 8.14 | 519 | 9.51 | -22.1 | -174.8 | 0.58 | 0.58 | 8.78  | 34.58 | 0.00 | 0.06 | 50.82  | 182.55 |
|  | S-RG10 | 2023/06/16 | 14:00 | 7.9  | 688 | 3.12 | -22.7 | -178.2 | 1.16 | 0.66 | 13.12 | 48.56 | 0.22 | 0.11 | 121.00 | 248.06 |
|  | S-RG11 | 2023/06/16 | 13:30 | 7.89 | 740 | 0.94 | -22.9 | -178.4 | 1.16 | 0.62 | 14.30 | 52.64 | 0.15 | 0.06 | 132.69 | 268.59 |
|  | S-RG8  | 2023/06/16 | 14:35 | 7.83 | 730 | 0.88 | -23.0 | -178.5 | 1.16 | 0.64 | 14.28 | 51.80 | 0.00 | 0.10 | 128.98 | 266.43 |
|  | S-RG9A | 2023/06/16 | 14:25 | 7.73 | 654 | 1.79 | -22.8 | -178.2 | 0.90 | 0.58 | 12.56 | 48.34 | 0.19 | 0.13 | 112.67 | 244.94 |
|  | S-RG9B | 2023/06/16 | 14:10 | 7.7  | 568 | 0.68 | -22.8 | -177.4 | 1.14 | 0.58 | 12.56 | 47.42 | 0.12 | 0.09 | 111.99 | 242.46 |
|  | S-GL1  | 2023/06/19 | 14:35 | 8.3  | 132 | 1.6  | -21.2 | -165.4 | 0.00 | 0.54 | 1.42  | 12.32 | 0.04 | 0.05 | 24.17  | 53.11  |
|  | S-GL1  | 2023/06/21 | 12:05 | 7.84 | 38  | 1.43 | -22.4 | -173.6 | 0.00 | 0.46 | 0.76  | 7.42  | 0.01 | 0.04 | 5.79   | 34.14  |

**Table S1: Physico-hydrochemical values of samples and measurements at sampling sites from June 2022 to June 2023.**
