# Supplementary material for: The influence of a rock glacier on the riverbed hydrological system
Source: Copernicus journal article supplement (doi:10.5194/hess-29-6479-2025), 2025-11-19
Supplement: Supplementary file [file hess-29-6479-2025-supplement-title-page.pdf › hess-29-6479-2025-supplement-title-page.pdf]

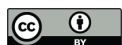

## *Supplement of*

# **The influence of a rock glacier on the riverbed hydrological system**

**Bastien Charonnat et al.**

*Correspondence to:* Bastien Charonnat (bastien.charonnat.1@ens.etsmtl.ca)

- hess-29-6479-2025-supplement-title-page.pdf
- Table S1.pdf

The copyright of individual parts of the supplement might differ from the article licence.
